# Supplementary material
Source: publisher figshare collection journal article supplement (https://acs.figshare.com/ndownloader/files/22575359)
Supplement: Supplementary file 1 [file 22575359]

# Supplementary material to “Organotin(IV) Derivatives of some O,C,O-chelating Ligands. Part 2.”

# (Organometallics)

# by

Libor Dostál, Roman Jambor, Aleš Růžička, Ivana Císařová, Jaroslav Holeček,

Monique Biesemans, Rudolph Willem, Frank De Proft, Paul Geerlings.

S1. *In silico* generated starting geometries for the geometry optimisations

S2. Further insights into the observed trends in Sn−O distances

**S1*. In silico* generated starting geometries for the geometry optimisations**

The geometry optimisations of compounds **1**, **2**, **3**, **9**, **10**, **12** and L-SnCl3 (with R=Me) were started from the crystal structures given in the supplementary material to reference 3a.

The geometry optimisations of compounds **5** and **6** were initiated from the crystal structures obtained in this contribution. The starting structures for the geometry optimisations of the compounds **4**, **7**, **8**, **11** and L-SnCl3 (for R = Et and *i*-Pr) were generated in silico and are given in Tables S3-S8. All geometries are supplied as Cartesian coordinates (Å).

**Table S1.** Starting geometry for the optimisation of compound **4**.

| C | −1.6248 | 1.0699 | −0.7475 |
| --- | --- | --- | --- |
| C | −2.9086 | 1.0550 | −0.1523 |
| C | −3.9188 | 1.8949 | −0.6247 |
| C | −3.6380 | 2.7915 | −1.6456 |
| C | −2.3527 | 2.8509 | −2.1854 |
| C | −1.3216 | 1.9933 | −1.7466 |
| C | −3.1846 | 0.1302 | 1.0023 |
| C | −1.9480 | −1.3212 | 2.7066 |
| C | −2.4393 | −0.8183 | 4.0507 |
| C | 1.0368 | 0.3297 | 1.6392 |
| C | 1.7068 | −0.5402 | 2.4919 |
| C | 2.5489 | −0.0281 | 3.4791 |
| C | 2.7126 | 1.3511 | 3.6100 |
| C | 2.0377 | 2.2193 | 2.7528 |
| C | 1.1957 | 1.7067 | 1.7673 |
| C | 0.0353 | 2.1820 | −2.3596 |
| C | 2.1241 | 3.2138 | −2.0267 |
| C | 3.0360 | 3.7760 | −0.9552 |
| H | 0.4574 | 1.2332 | −2.6812 |
| H | −0.0451 | 2.8005 | −3.2631 |
| H | 2.5566 | 4.6134 | −0.4378 |
| H | 3.9797 | 4.1195 | −1.3880 |
| H | 3.2554 | 3.0155 | −0.1994 |
| H | 1.9351 | 3.9763 | −2.7902 |
| H | 2.5960 | 2.3454 | −2.4985 |
| H | −4.9199 | 1.8728 | −0.1982 |
| H | −4.4120 | 3.4624 | −2.0147 |
| H | −2.1550 | 3.5909 | −2.9617 |
| H | −3.8616 | 0.6067 | 1.7193 |
| H | −3.6411 | −0.7950 | 0.6396 |
| H | −0.9503 | −1.7477 | 2.8305 |
| H | −2.6107 | −2.1046 | 2.3268 |
| H | −1.7855 | −0.0284 | 4.4353 |
| H | −2.4570 | −1.6344 | 4.7794 |
| H | −3.4510 | −0.4073 | 3.9750 |
| H | 1.5943 | −1.6123 | 2.3941 |
| H | 3.0873 | −0.7019 | 4.1430 |
| H | 3.3781 | 1.7499 | 4.3739 |
| H | 2.1800 | 3.2943 | 2.8440 |
| H | 0.6875 | 2.3844 | 1.0878 |
| O | −1.8821 | −0.1738 | 1.7269 |
| O | 0.8877 | 2.8339 | −1.4218 |
| C | 1.2603 | −0.7662 | −1.2305 |
| C | −0.8448 | −2.4630 | −0.0539 |
| Sn | −0.3451 | −0.3933 | 0.1765 |
| C | −1.5475 | −5.1373 | −0.3641 |
| C | −0.0368 | −3.4555 | 0.4887 |
| C | −1.9861 | −2.8008 | −0.7788 |
| C | −2.3419 | −4.1403 | −0.9292 |
| C | −0.3918 | −4.7960 | 0.3385 |
| H | 0.8795 | −3.2019 | 1.0062 |
| H | −2.5875 | −2.0306 | −1.2505 |
| H | −3.2278 | −4.4123 | −1.4995 |
| H | 0.2394 | −5.5784 | 0.7552 |
| H | −1.8176 | −6.1846 | −0.4889 |
| C | 3.2277 | −1.3299 | −3.1468 |
| C | 2.5926 | −0.4479 | −0.9836 |
| C | 0.9183 | −1.3553 | −2.4529 |
| C | 1.8964 | −1.6401 | −3.4072 |
| C | 3.5751 | −0.7314 | −1.9378 |
| H | 2.9056 | 0.0329 | −0.0675 |
| H | −0.1177 | −1.5844 | −2.6764 |
| H | 1.6193 | −2.1018 | −4.3520 |
| H | 4.6146 | −0.4816 | −1.7365 |
| H | 3.9944 | −1.5507 | −3.8864 |

**Table S2.** Starting geometry for the optimisation of compound **7**.

| C | −0.5100 | −1.7726 | −0.7462 |
| --- | --- | --- | --- |
| C | 0.4047 | −2.6859 | −1.3269 |
| C | −0.0559 | −3.8020 | −2.0276 |
| C | −1.4206 | −3.9782 | −2.2068 |
| C | −2.3169 | −3.0400 | −1.6934 |
| C | −1.8799 | −1.9208 | −0.9533 |
| C | 1.8866 | −2.4456 | −1.1942 |
| C | 3.5255 | −0.4569 | −0.7632 |
| C | −2.9285 | −0.9449 | −0.5069 |
| C | −4.0650 | 1.0306 | −1.1890 |
| C | 0.7406 | 1.6501 | −0.7301 |
| C | 1.6077 | 2.6392 | −0.2803 |
| C | 1.7610 | 3.8119 | −1.0200 |
| C | 1.0482 | 3.9869 | −2.2063 |
| C | 0.1789 | 2.9923 | −2.6525 |
| C | 0.0270 | 1.8204 | −1.9133 |
| C | 4.0348 | 0.0928 | −2.0940 |
| C | 4.4933 | −1.4978 | −0.2154 |
| C | −3.6797 | 2.4051 | −1.7224 |
| C | −5.3005 | 0.5123 | −1.9191 |
| H | 0.6337 | −4.5288 | −2.4528 |
| H | −1.7943 | −4.8348 | −2.7653 |
| H | −3.3807 | −3.1846 | −1.8857 |
| H | 2.2694 | −3.0203 | −0.3471 |
| H | 2.4076 | −2.7466 | −2.1091 |
| H | 3.4787 | 0.3726 | −0.0523 |
| H | −3.9060 | −1.4410 | −0.4828 |
| H | −2.7461 | −0.6001 | 0.5057 |
| H | −4.2670 | 1.1167 | −0.1142 |
| H | 2.1592 | 2.5185 | 0.6431 |
| H | 2.4293 | 4.5964 | −0.6700 |
| H | 1.1610 | 4.9067 | −2.7781 |
| H | −0.3906 | 3.1377 | −3.5684 |
| H | −0.6677 | 1.0572 | −2.2518 |
| H | 4.0975 | −0.6959 | −2.8520 |
| H | 5.0297 | 0.5356 | −1.9791 |
| H | 3.3642 | 0.8672 | −2.4812 |
| H | 4.1384 | −1.9197 | 0.7282 |
| H | 5.4739 | −1.0473 | −0.0268 |
| H | 4.6413 | −2.3251 | −0.9178 |
| H | −2.8068 | 2.7903 | −1.1864 |
| H | −4.4978 | 3.1224 | −1.6051 |
| H | −3.4035 | 2.3545 | −2.7815 |
| H | −5.0900 | 0.3616 | −2.9837 |
| H | −6.1390 | 1.2089 | −1.8217 |
| H | −5.6187 | −0.4566 | −1.5225 |
| C | −0.8870 | 0.6564 | 1.6894 |
| C | 1.6850 | −0.7435 | 2.0303 |
| O | 2.1203 | −0.9677 | −0.9833 |
| O | −2.9556 | 0.1525 | −1.4166 |
| Sn | 0.5367 | −0.2103 | 0.3042 |
| C | 3.1746 | −1.4985 | 4.2552 |
| C | 1.6912 | −2.0754 | 2.4417 |
| C | 2.3940 | 0.2164 | 2.7421 |
| C | 3.1460 | −0.1627 | 3.8541 |
| C | 2.4417 | −2.4550 | 3.5535 |
| H | 1.0971 | −2.8170 | 1.9174 |
| H | 2.3516 | 1.2602 | 2.4593 |
| H | 3.6987 | 0.5843 | 4.4204 |
| H | 2.4462 | −3.4912 | 3.8852 |
| H | 3.7538 | −1.7905 | 5.1297 |
| C | −2.7362 | 1.6314 | 3.5583 |
| C | −1.3695 | −0.1669 | 2.7132 |
| C | −1.3503 | 1.9659 | 1.6019 |
| C | −2.2712 | 2.4537 | 2.5347 |
| C | −2.2870 | 0.3173 | 3.6472 |
| H | −1.0462 | −1.1994 | 2.7810 |
| H | −1.0302 | 2.6351 | 0.8158 |
| H | −2.6275 | 3.4789 | 2.4600 |
| H | −2.6523 | −0.3306 | 4.4405 |
| H | −3.4510 | 2.0143 | 4.2837 |

**Table S3.** Starting geometry for the optimisation of compound **8**.

| C | −0.1469 | −1.9829 | −0.1709 |
| --- | --- | --- | --- |
| C | 0.7562 | −2.9334 | −0.7055 |
| C | 0.2823 | −4.0569 | −1.3828 |
| C | −1.0838 | −4.2035 | −1.5822 |
| C | −1.9674 | −3.2298 | −1.1120 |
| C | −1.5157 | −2.1011 | −0.3974 |
| C | 2.2379 | −2.7131 | −0.5402 |
| C | 3.8968 | −0.7180 | −0.2251 |
| C | −2.5396 | −1.0835 | 0.0120 |
| C | −3.5764 | 0.9216 | −0.7405 |
| C | 1.1744 | 1.4587 | −0.1362 |
| C | 2.0244 | 2.4137 | 0.4145 |
| C | 2.2371 | 3.6136 | −0.2613 |
| C | 1.5998 | 3.8476 | −1.4809 |
| C | 0.7460 | 2.8858 | −2.0234 |
| C | 0.5332 | 1.6848 | −1.3490 |
| C | 4.3669 | −0.1691 | −1.5706 |
| C | 4.8783 | −1.7637 | 0.2907 |
| C | −3.1272 | 2.2967 | −1.2198 |
| C | −4.7465 | 0.4300 | −1.5879 |
| H | 0.9609 | −4.8139 | −1.7715 |
| H | −1.4687 | −5.0680 | −2.1210 |
| H | −3.0310 | −3.3571 | −1.3172 |
| H | 2.5809 | −3.2380 | 0.3560 |
| H | 2.7815 | −3.0747 | −1.4189 |
| H | 3.8743 | 0.1106 | 0.4888 |
| H | −3.5394 | −1.5316 | −0.0253 |
| H | −2.3937 | −0.7645 | 1.0408 |
| H | −3.8740 | 0.9979 | 0.3126 |
| H | 2.5082 | 2.2344 | 1.3699 |
| H | 2.8908 | 4.3733 | 0.1631 |
| H | 1.7585 | 4.7894 | −2.0041 |
| H | 0.2364 | 3.0819 | −2.9649 |
| H | −0.1505 | 0.9475 | −1.7596 |
| H | 4.3995 | −0.9570 | −2.3314 |
| H | 5.3680 | 0.2666 | −1.4871 |
| H | 3.6899 | 0.6106 | −1.9349 |
| H | 4.5497 | −2.1900 | 1.2427 |
| H | 5.8648 | −1.3156 | 0.4527 |
| H | 5.0048 | −2.5881 | −0.4193 |
| H | −2.2989 | 2.6628 | −0.6057 |
| H | −3.9427 | 3.0244 | −1.1641 |
| H | −2.7618 | 2.2550 | −2.2518 |
| H | −4.4406 | 0.2887 | −2.6305 |
| H | −5.5806 | 1.1381 | −1.5593 |
| H | −5.1141 | −0.5384 | −1.2356 |
| C | −0.4775 | 0.4286 | 2.2640 |
| Cl | 2.2936 | −0.9603 | 2.7535 |
| O | 2.4839 | −1.2256 | −0.4033 |
| O | −2.4619 | 0.0299 | −0.8759 |
| Sn | 0.9184 | −0.4194 | 0.8496 |
| C | −2.3165 | 1.3557 | 4.1620 |
| C | −0.9240 | −0.4101 | 3.2916 |
| C | −0.9716 | 1.7270 | 2.1838 |
| C | −1.8872 | 2.1915 | 3.1329 |
| C | −1.8370 | 0.0511 | 4.2409 |
| H | −0.5710 | −1.4347 | 3.3483 |
| H | −0.6792 | 2.4012 | 1.3906 |
| H | −2.2682 | 3.2086 | 3.0676 |
| H | −2.1757 | −0.6060 | 5.0385 |
| H | −3.0278 | 1.7210 | 4.9001 |

**Table S4.** Starting geometry for the optimisation of compound **11**.

| C | 6.5940 | 5.2062 | 0.9217 |
| --- | --- | --- | --- |
| C | 5.3967 | 5.2196 | 1.6500 |
| C | 4.3424 | 5.9844 | 1.2062 |
| C | 4.4318 | 6.7627 | 0.0683 |
| C | 5.6112 | 6.7224 | −0.6827 |
| C | 6.6834 | 5.9576 | −0.2731 |
| C | 5.2180 | 4.3877 | 2.8789 |
| C | 5.3967 | 2.0395 | 3.5844 |
| C | 7.9343 | 5.9173 | −1.1151 |
| C | 9.2031 | 4.2803 | −2.3896 |
| C | 8.5403 | 1.9956 | 1.0267 |
| H | 8.9350 | 4.1193 | −4.4378 |
| H | 7.9879 | 5.2062 | −3.8006 |
| H | 10.8292 | 5.3001 | −1.6272 |
| H | 10.0072 | 6.1723 | −2.6399 |
| H | 7.2731 | 1.2479 | 3.6299 |
| C | 5.3967 | 2.5226 | 5.0295 |
| C | 4.0029 | 1.5699 | 3.1634 |
| C | 6.3975 | 0.9393 | 3.3909 |
| C | 9.7392 | 2.8983 | −2.1620 |
| C | 10.3467 | 5.2867 | −2.4579 |
| C | 8.3632 | 4.3206 | −3.6868 |
| C | 10.0485 | 4.9927 | 1.2893 |
| Cl | 8.5419 | 4.1462 | 3.9144 |
| O | 5.8256 | 3.0996 | 2.6513 |
| O | 8.3453 | 4.5487 | −1.2517 |
| Sn | 8.2202 | 3.9986 | 1.5703 |
| H | 3.5383 | 5.9844 | 1.6841 |
| H | 3.7170 | 7.2994 | −0.1934 |
| H | 5.6648 | 7.2189 | −1.4679 |
| H | 5.6469 | 4.8171 | 3.6413 |
| H | 4.2709 | 4.2803 | 3.0837 |
| H | 7.7556 | 6.3065 | −1.9913 |
| H | 8.6312 | 6.4406 | −0.6941 |
| H | 10.2753 | 2.8983 | −1.3655 |
| H | 7.6662 | 3.6765 | −3.6299 |
| H | 10.9543 | 5.0452 | −3.1634 |
| H | 10.2753 | 2.6299 | −2.9130 |
| H | 9.0065 | 2.2811 | −2.0596 |
| H | 6.2545 | 2.8983 | 5.2457 |
| H | 5.2359 | 1.7712 | 5.6099 |
| H | 4.7177 | 3.1667 | 5.1547 |
| H | 3.3774 | 2.2945 | 3.2658 |
| H | 3.7170 | 0.8453 | 3.7209 |
| H | 4.0208 | 1.2881 | 2.2417 |
| H | 6.3975 | 0.6575 | 2.4692 |
| H | 6.1473 | 0.1879 | 3.9371 |
| C | 12.4622 | 6.3051 | 0.9183 |
| C | 10.6519 | 5.6473 | 2.3517 |
| C | 10.6519 | 4.9942 | 0.0413 |
| C | 11.8588 | 5.6504 | −0.1442 |
| C | 11.8588 | 6.3035 | 2.1662 |
| H | 10.1748 | 5.6461 | 3.3384 |
| H | 10.1748 | 4.4766 | −0.7987 |
| H | 12.3359 | 5.6517 | −1.1309 |
| H | 12.3359 | 6.8212 | 3.0063 |
| H | 13.4164 | 6.8239 | 0.7716 |
| C | 8.9629 | −0.6488 | 0.3091 |
| C | 8.6460 | 1.6489 | −0.3112 |
| C | 8.6460 | 1.0201 | 2.0059 |
| C | 8.8573 | −0.3021 | 1.6471 |
| C | 8.8573 | 0.3267 | −0.6700 |
| H | 8.5624 | 2.4201 | −1.0854 |
| H | 8.5624 | 1.2942 | 3.0638 |
| H | 8.9408 | −1.0734 | 2.4213 |
| H | 8.9408 | 0.0526 | −1.7279 |
| H | 9.1300 | −1.6942 | 0.0255 |

**Table S5.** Starting geometry for the optimisation of compound L-SnCl3 (with R=Et).

| C | −0.8216 | −0.1157 | 0.6772 |
| --- | --- | --- | --- |
| C | −0.3124 | −0.1504 | 1.9953 |
| C | −0.8952 | 0.6314 | 2.9908 |
| C | −1.9436 | 1.4824 | 2.6585 |
| C | −2.3973 | 1.5603 | 1.3382 |
| C | −1.8344 | 0.7677 | 0.3206 |
| C | 0.8642 | −1.0435 | 2.2968 |
| C | 2.7408 | −2.3114 | 1.0965 |
| C | 4.0222 | −1.6987 | 1.6282 |
| Cl | 1.8747 | −0.6897 | −2.0947 |
| Cl | 0.0477 | −3.8351 | −0.0673 |
| Sn | 0.2409 | −1.5030 | −0.5642 |
| O | −1.2278 | 1.3822 | −1.8874 |
| O | 1.6663 | −1.2564 | 1.0140 |
| Cl | −1.1376 | −1.9850 | −2.5036 |
| C | −2.3227 | 0.9432 | −1.0863 |
| C | −1.6576 | 1.7635 | −3.1946 |
| C | −0.4389 | 2.1532 | −4.0066 |
| H | −2.7421 | 0.0072 | −1.4642 |
| H | −3.1198 | 1.6962 | −1.1215 |
| H | 0.1069 | 2.9670 | −3.5182 |
| H | −0.7265 | 2.4731 | −5.0120 |
| H | 0.2538 | 1.3099 | −4.0912 |
| H | −2.3424 | 2.6154 | −3.1218 |
| H | −2.1752 | 0.9266 | −3.6759 |
| H | −0.5427 | 0.5983 | 4.0201 |
| H | −2.4045 | 2.1052 | 3.4244 |
| H | −3.1993 | 2.2624 | 1.1081 |
| H | 1.5226 | −0.5767 | 3.0364 |
| H | 0.5094 | −2.0075 | 2.6754 |
| H | 2.9224 | −2.7135 | 0.0955 |
| H | 2.4136 | −3.1326 | 1.7414 |
| H | 4.3534 | −0.8708 | 0.9924 |
| H | 4.8190 | −2.4481 | 1.6587 |
| H | 3.8842 | −1.3070 | 2.6411 |

**Table S6.** Starting geometry for the optimisation of compound L-SnCl3 (with R=*i*-Pr).

| C | 0.2371 | −0.4741 | 1.0495 |
| --- | --- | --- | --- |
| C | −0.6446 | 0.0460 | 2.0267 |
| C | −0.1433 | 0.5447 | 3.2280 |
| C | 1.2318 | 0.5736 | 3.4303 |
| C | 2.0998 | 0.1171 | 2.4344 |
| C | 1.6158 | −0.4078 | 1.2211 |
| C | −2.1282 | 0.0476 | 1.7505 |
| C | −3.7508 | 0.0006 | −0.2978 |
| C | 2.6040 | −0.8196 | 0.1709 |
| C | 3.4784 | −0.0902 | −1.9238 |
| Cl | −0.9847 | 0.0924 | −2.6147 |
| H | 3.6755 | 0.2867 | −4.0583 |
| H | 2.5066 | 1.3472 | −3.2338 |
| H | 5.0878 | 0.5106 | −0.5869 |
| Cl | −2.2632 | −3.1345 | −0.3190 |
| O | 2.4209 | 0.0236 | −0.9640 |
| C | −4.1436 | 1.4340 | −0.6470 |
| C | −4.7758 | −0.6182 | 0.6442 |
| C | 2.9124 | 0.3302 | −3.2752 |
| C | 4.6402 | 0.8198 | −1.5362 |
| H | −0.8033 | 0.9212 | 4.0075 |
| H | 1.6385 | 0.9686 | 4.3605 |
| H | 3.1733 | 0.1854 | 2.6142 |
| H | −2.5752 | −0.8395 | 2.2087 |
| H | −2.5935 | 0.9531 | 2.1528 |
| H | −3.7388 | −0.5828 | −1.2250 |
| H | 3.6252 | −0.7198 | 0.5550 |
| H | 2.4655 | −1.8709 | −0.0924 |
| H | 3.8156 | −1.1317 | −1.9925 |
| Sn | −0.8633 | −1.2251 | −0.6318 |
| H | 4.2989 | 1.8520 | −1.4004 |
| Cl | 0.5864 | −2.7191 | −1.8828 |
| O | −2.3436 | 0.0231 | 0.2500 |
| H | 5.4247 | 0.8065 | −2.2994 |
| H | −4.1595 | 2.0709 | 0.2444 |
| H | −5.1368 | 1.4662 | −1.1070 |
| H | −3.4309 | 1.8744 | −1.3525 |
| H | −4.4940 | −1.6339 | 0.9352 |
| H | −5.7571 | −0.6722 | 0.1602 |
| H | −4.8935 | −0.0291 | 1.5601 |
| H | 2.0857 | −0.3270 | −3.5635 |

**S2. Further insights into the observed trends in Sn-O distances**

In order to gain further insight into the observed trends in the Sn-O distances in the compounds presented in this paper, we discuss two sets of additional data obtained from ab initio calculations.

In a first part, we have investigated a number of density functional theory based reactivity indices for a series of two model compounds, in order to gain insight into the Lewis acid-Lewis base interaction between the Sn and O atom. All calculations on these model compounds were performed at the B3LYP[[1]](#endnote-2)/6-31G**[[2]](#endnote-3) level of theory, except for the Sn atom for which a LANL2DZ+P[[3]](#endnote-4) basis set was used.

Density functional theory provides a very convenient framework for the discussion of chemical reactivity. A series of global and local quantities have been introduced to describe the extent of the response of an atomic or molecular system to external perturbations[[4]](#endnote-5). These quantities are also termed reactivity descriptors, of which an important example is the Fukui function, introduced by Parr and Yang[[5]](#endnote-6) and defined as the initial response of the electron density due to an infinitesimal perturbation in the total number of electrons , at constant external (i.e. due to the nuclei) potential . Due to the discontinuity of the electron density with respect to the number of electrons, three different Fukui functions can be introduced, representing the case of a nucleophilic attack , an electrophilic attack or a neutral (radical) attack :

(1)

(2)

(3)

where , and are the electron densities of the , and electron system respectively, all obtained at the geometry of the electron system, due to the fact that the derivative is taken at a constant external potential. However, in chemistry it is custom to work with properties associated with atoms or functional groups in a molecule. In this context, a useful approximation to describe the site-reactivity is given by the condensed-to-atom Fukui indices by using an atomic charge-partitioning scheme[[6]](#endnote-7):

(4)

(5)

(6)

where, and now represent the electron populations on atom in the , and electron system. In order to compare the reactivity of atomic sites in different molecules, one has to compute the local softness [[7]](#endnote-8),[[8]](#endnote-9) by multiplying the relevant Fukui function (i.e. for a nucleophilic, electrophilic or radical attack) with the global softness of the compound

(7)

This global softness can be approximately computed using the vertical ionization energy (IE) and electron affinity (EA) of the systemError: Reference source not found:

(8)

High values of the local softness on an atomic site imply a high affinity for soft Lewis bases or acids, depending on whether Eq. (7) uses either or to compute the local softness. Numerous applications in the literature have demonstrated the usefulness of these reactivity indices.[[9]](#endnote-10)

A first series of model compounds consists of the compounds Ph-CH2-O-R
(R = Me, Et, *i*-Pr and *t*-Bu), for which the condensed local softness on the oxygen atom was computed. These compounds, used to model the alkoxy moiety in the structures investigated, are listed in Table S7, together with their softnesses, the atomic charges (obtained using the Natural Population analysis[[10]](#endnote-11)) on the oxygen and tin atoms and the condensed Fukui functions and local softnesses for an electrophilic attack on the oxygen atom. As can be seen, the oxygen atom becomes more negative from R = Me to R = *t*-Bu, indicating its increasing Lewis basicity; the local softness also increases with increasing alkyl group size, but a maximum is encountered for *i*-Pr.

Next, the relevant reactivity indices were computed for a second series of model compounds, SnPhnCl(4–n) (n = 1–4), in order to model the influence of the gradual substitution of phenyl groups by chlorine atoms on the Lewis acidity of their tin atom. Table S8 reveals that the condensed local softness (now for the attack of a nucleophile) on the tin atom in these compounds increases upon increasing number of chlorine atoms, thus indicating a higher affinity for soft Lewis bases. This increase of the local softness on the tin atom is accompanied by a decrease of the positive charge on the tin atom, due to the p-d donor effect from the chlorine atoms toward the tin atom being stronger than that from the phenyl ring, reflecting again the Lewis acidity increase with the number of chlorine atoms.

The highest values of the local softness are thus found on the oxygen atom in the Ph-CH2-O*i*-Pr compound and the Sn in the SnPhCl3 compound.  This is in line with the shortest Sn-O bonds being observed with the bulkier substituents on the oxygen atom and increasing number of chlorine atoms on the tin atoms in the parent compounds studied in this paper.

**Table S7.** Reactivity descriptors for the Ph-CH2-OR systems, obtained at the B3LYP/6−31G** level.

| Molecule | qO | S (au) | f (au) | s (au) |
| --- | --- | --- | --- | --- |
| Ph-CH2-OMe | 0.571 | 2.578 | 0.1367 | 0.3525 |
| Ph-CH2-OEt | 0.583 | 2.591 | 0.1476 | 0.3824 |
| Ph-CH2-O*i*Pr | 0.593 | 2.625 | 0.1770 | 0.4648 |
| Ph-CH2-O*t*Bu | 0.602 | 2.602 | 0.1566 | 0.4075 |

**Table S8.** Reactivity descriptors for the Sn(Ph)nCl4−n (n = 4, 3, 2, 1), obtained at the B3LYP/6−31G** level (LANL2DZ+P on Sn).

| Molecule | qSn | S(au) | f (au) | s (au) |
| --- | --- | --- | --- | --- |
| SnPh4 | 2.003 | 3.208 | 0.1063 | 0.3408 |
| SnPh3Cl | 2.000 | 3.240 | 0.2092 | 0.6779 |
| SnPh2Cl2 | 1.955 | 3.004 | 0.2197 | 0.6601 |
| SnPhCl3 | 1.890 | 2.918 | 0.4015 | 1.1716 |

Next, we have investigated the Mulliken charges[[11]](#endnote-12) on the Sn atoms in the organotin(IV) derivatives that were studied in the paper. Table S9 lists these charges, obtained at the B3LYP/LANL2DZ level.

**Table S9.** Mulliken charges on the tin atom in the different compounds studied in this work, obtained at the B3LYP/LANL2DZ level of theory.

|  | L-SnPh3 | L-SnPh3Cl | L-SnPhCl2 | L-SnCl3 |
| --- | --- | --- | --- | --- |
| Me | 1.322 | 1.205 | 1.164 | 1.144 |
| Et | 1.305 | 1.156 | 1.122 | 1.118 |
| *i*-Pr | 1.302 | 1.199 | 1.118 | 1.099 |
| *t*-Bu | 1.255 | 1.099 | 1.095 | − |

As can be seen, the charge on the tin atom in the complexes decreases upon increasing substitution of phenyl rings with chlorine atoms and with increasing alkyl group size on the oxygen atoms. This result also points towards a stronger interaction between O and Sn upon increasing chlorine substitution and increasing alkyl group size attached to the oxygen atoms.

**References**

1. . (a) Becke, A. D. *J. Chem. Phys*. **1993**, 98, 5648. (b) Lee, C. ; Yang, W. ; Parr, R. G. *Phys. Rev. B* **1988**, *37*, 785. (c) Stevens, P. J. ; Delvin, F. J. ; Chablaoski, C. F. ; Frisch, M. J. *J. Phys. Chem.* **1994**, *98*, 11623. [↑](#endnote-ref-2)
2. . For a detailed account on these types of basis sets, see e.g. W. J. Hehre, L. Radom, P. v. R. Schleyer and J. A. Pople, *Ab Initio Molecular Orbital Theory*, Wiley: New York, 1986. [↑](#endnote-ref-3)
3. . (a) Wadt, W. R. ; Hay, P. J. *J. Chem. Phys*. **1985**, *82*, 270. Höllwarth, A.; Böhme, M.; Dapprich, S.; Ehlers, A. W.; Gobbi, A.; Jonas, V.; Köhler, K. F.; Stegmann, R.; Veldkamp, A.; Frenking, G. *Chem. Phys. Lett.* **1993**, *208*, 237. [↑](#endnote-ref-4)
4. . (a) Parr, R. G.; Yang, W. *Density Functional Theory of Atoms and Molecules*, Oxford University Press: New York, 1989. (b) Parr, R. G. ; Yang, W. *Ann. Rev. Phys. Chem.* **1995**, *46*, 701. (c) Kohn, W. ; Becke, A. D. ; Parr, R. G. *J. Phys. Chem.* **1996**, *100*, 12974. (d) Chermette, H. *J. Comp. Chem.* **1999**, *20*, 129. (e) Geerlings, P. ; De Proft, F. ; Langenaeker, W. *Adv. Quant. Chem.* **1999**, *33*, 303. (f) Geerlings, P. ; De Proft, F. ; Langenaeker, W. *Chem. Rev.* **2003** *103*, 1793. [↑](#endnote-ref-5)
5. . Parr, R. G. ; Yang, W. *J. Am. Chem. Soc.* **1984***, 106,*4049. [↑](#endnote-ref-6)
6. . Yang, W. ; Mortier, W. J. *J. Am. Chem. Soc.* **1986***, 106***,** 5708. [↑](#endnote-ref-7)
7. . Yang, W. ; Parr, R. G. *Proc. Natl. Acad. Sci. USA* **1985***, 82*,6723. [↑](#endnote-ref-8)
8. . Lee, C. ; Yang, W. ; Parr, R. G. *J. Mol. Struct.* (*Theochem.*) **1988**, *163***,**305. [↑](#endnote-ref-9)
9. . (a) Gázquez, J. L. 1993 in *Chemical Hardness: Structure and bonding* (ed.) Sen, K. D. vol. 80, p. 27. (b) Méndez, F.; Gázquez, J. L. *J. Am. Chem. Soc.* **1994**, *116***,** 9298. (c) Gázquez, J. L.; Méndez, F. *J. Phys. Chem.* **1994**, *98***,** 4591. (d) Méndez, F.; Gázquez, J. L. *Proc. Indian Acad. Sci.* **1994**, *106***,** 183. (e) Damoun, S.; Van de Woude, G.; Méndez, F.; Geerlings, P. *J. Phys. Chem*. *A* **1997**, *101*,886. (f) Geerlings, P.; De Proft, F. *Int. J. Quantum Chem.* **2000**, *80*, 227. [↑](#endnote-ref-10)
10. . Reed, A. E.; Weinstock, R. B.; Weinhold, F. *J. Chem. Phys.* **1985**, *83*, 735. [↑](#endnote-ref-11)
11. . Mulliken, R. S. *J. Chem. Phys.* **1955**, *23*, 1833. [↑](#endnote-ref-12)
